# Supplementary material for: Assessing the professional quality of life in the context of pediatric care
Source: PeerJ journal article supplement (doi:10.7717/peerj.17120), 2024-03-15
Supplement: STROBE.pdf [file STROBE.pdf]

STROBE Statement—Checklist of items that should be included in reports of *cross-sectional studies*

|                           | <b>Item No</b> | <b>Recommendation</b>                                                             |
|---------------------------|----------------|-----------------------------------------------------------------------------------|
| <b>Title and abstract</b> | 1              | (a) done<br>(b) done                                                              |
| <b>Introduction</b>       |                |                                                                                   |
| Background/rationale      | 2              | Done, pages 3-7.                                                                  |
| Objectives                | 3              | Done, page. 7.                                                                    |
| <b>Methods</b>            |                |                                                                                   |
| Study design              | 4              | Done, page 8                                                                      |
| Setting                   | 5              | Done, pages 8                                                                     |
| Participants              | 6              | Done, pages 8-9                                                                   |
| Variables                 | 7              | Done, pages 9.                                                                    |
| Data sources/ measurement | 8*             | Done, pages 9                                                                     |
| Bias                      | 9              | Done, page 8                                                                      |
| Study size                | 10             | Done, pages 8.                                                                    |
| Quantitative variables    | 11             | Done, page 10                                                                     |
| Statistical methods       | 12             | Done, page 10<br>Done, page 10<br>Done, page 10<br>Done, page 10<br>Done, page 10 |
| <b>Results</b>            |                |                                                                                   |
| Participants              | 13*            | Done, page 11<br>Done, page 11<br>Done, page 11                                   |
| Descriptive data          | 14*            | Done, page 11<br>Done, page 11                                                    |
| Outcome data              | 15*            | Done, page 11                                                                     |
| Main results              | 16             | Done, page 11<br>Done, page 11<br>Done, page 11                                   |
| Other analyses            | 17             | Done, page 12                                                                     |
| <b>Discussion</b>         |                |                                                                                   |
| Key results               | 18             | Done, page 12-15                                                                  |
| Limitations               | 19             | Done, page 16                                                                     |
| Interpretation            | 20             | Done, page 12-15                                                                  |
| Generalisability          | 21             | Done, page 16                                                                     |
| <b>Other information</b>  |                |                                                                                   |
| Funding                   | 22             | N/A                                                                               |

\*Give information separately for exposed and unexposed groups.

**Note:** An Explanation and Elaboration article discusses each checklist item and gives methodological background and published examples of transparent reporting. The STROBE checklist is best used in conjunction with this article (freely available on the Web sites of PLoS Medicine at <http://www.plosmedicine.org/>, Annals of Internal Medicine at

<http://www.annals.org/>, and *Epidemiology* at <http://www.epidem.com/>). Information on the STROBE Initiative is available at [www.strobe-statement.org](http://www.strobe-statement.org).
